# Supplementary material for: A Quality Improvement Initiative to Reduce Postoperative Delirium among Cardiac Surgery Patients
Source: MDPI journal article supplement (doi:10.3390/geriatrics6040111), 2021-11-16
Supplement: s1 [file s1]

**Table S1.** Delirium Quality improvement.

| <u>Timeline</u>  | <u>Event</u>                                             | <u>Location</u>                      | <u>Surgical phase</u>                                                                                     | <u>Actions</u>                                                                                              | <u>Purpose</u>                                                                            | <u>Comments</u>                                |
|------------------|----------------------------------------------------------|--------------------------------------|-----------------------------------------------------------------------------------------------------------|-------------------------------------------------------------------------------------------------------------|-------------------------------------------------------------------------------------------|------------------------------------------------|
| <u>2009-2010</u> | Delirium Screening-research project                      | ICCS                                 | Preoperative                                                                                              | CAM- education and information                                                                              | Staff education                                                                           | Delirium Assessment                            |
|                  |                                                          | CSIU                                 | Preoperative                                                                                              | CAM- education and information                                                                              |                                                                                           |                                                |
| <u>2010</u>      | Delirium screening                                       | ICCS                                 | Preoperative                                                                                              | CAM-ICU (2/day)                                                                                             | Delirium Screening                                                                        | Delirium assessment                            |
|                  |                                                          | CSIU                                 | Preoperative                                                                                              | CAM                                                                                                         |                                                                                           |                                                |
|                  | Delirium Decision tree                                   | CSIU                                 | Preoperative                                                                                              | Risk factors + CAM + RASS                                                                                   | A combined evaluation of preexisting risk factors, confusion and agitation                | Risk factor and Delirium Assessment            |
| <u>2012</u>      | WRHA surgical delirium program                           | CSIU                                 | Preoperative                                                                                              | CAM- education and information                                                                              | Staff education                                                                           | Delirium Assessment                            |
|                  | Frailty evaluation                                       | CSIU                                 | Preoperative                                                                                              | CFS                                                                                                         | Evaluate frailty as a risk factor of delirium                                             | Risk factor evaluation                         |
|                  |                                                          | Cardiac surgeon                      | Preoperative                                                                                              |                                                                                                             |                                                                                           |                                                |
|                  | Cardiac science transdisciplinary delirium working group | Cardiac science program              | -                                                                                                         | A transdisciplinary team to plan and guide delirium program implementation in various cardiac surgery units | Delirium project planning and implementation, Delirium management – guideline development | leadership                                     |
| <u>2013</u>      | Preoperative assessment package                          | CPAC                                 | Preoperative                                                                                              | MoCA, PHQ-9, CFS                                                                                            | Delirium, Depression, Frailty                                                             | Risk factor and Delirium assessment            |
|                  | WRHA delirium brochure                                   | Preoperative cardiac surgery package | Preoperative                                                                                              | Preoperative mailing package                                                                                |                                                                                           | Preoperative delirium education and assessment |
|                  | “Getting to know you” form                               |                                      |                                                                                                           |                                                                                                             |                                                                                           |                                                |
|                  | ‘Primary care physician’ - letter                        |                                      | Preoperative                                                                                              | To inform FP of the patients high risk of depression                                                        |                                                                                           | Delirium prevention                            |
| <u>2013-2014</u> | Cardiac science-delirium guideline development           | Cardiac science program              | The goal was to adapt WRHA delirium program with specific additions related to cardiac surgery population |                                                                                                             |                                                                                           |                                                |
| <u>2014</u>      | Cardiac science delirium scoring system                  | CPAC                                 | Preoperative                                                                                              | The pre assessment screening test                                                                           | Baseline risk factor assessment, MoCA, PHQ-9, AUDIT                                       | Risk factor and delirium assessment            |
|                  | Delirium Screening                                       | ICCS                                 | Postoperative                                                                                             | CAM-4 hourly                                                                                                |                                                                                           | Delirium screening                             |

|                    |                                    |                                             |               |                                                                                |                                                 |                                    |
|--------------------|------------------------------------|---------------------------------------------|---------------|--------------------------------------------------------------------------------|-------------------------------------------------|------------------------------------|
|                    | Pain assessment                    | ICCS                                        | Postoperative | CPOT                                                                           | Asses level of pain                             | Risk of delirium assessment        |
| <b><u>2015</u></b> | Cardiac science family brochure    |                                             |               |                                                                                | Family mental health                            | Family support                     |
|                    | Delirium pre op assessment package | CSIU, Cardiology In-patient, CPAC, CRIU     | Preoperative  | Baseline risk factor, MoCA, PHQ-9, AUDIT                                       |                                                 | Delirium assessment                |
|                    | Delirium order set                 | ICCS                                        | Postoperative | Medication orders, General orders<br>Adjunct therapy, Additional consideration | Support clinical judgment and clinical practice | Delirium prevention and management |
|                    | 'primary care physician' - letter  |                                             | Postoperative |                                                                                | To inform delirium occurrence                   | Delirium management                |
|                    | Cardiac surgical time out process  | Operative                                   | Operative     | Delirium Score                                                                 |                                                 | Delirium prevention                |
| <b><u>2016</u></b> | Early mobility                     | ICCS                                        | Postoperative | Early mobility                                                                 |                                                 | Delirium prevention                |
|                    | Nursing education delirium module  | Cardiology inpatient unit, ICCS, CPAC, CSIU |               |                                                                                |                                                 | Staff education                    |

|                                                                                                                                                                                               |                                                                                                                                                                                                 |
|-----------------------------------------------------------------------------------------------------------------------------------------------------------------------------------------------|-------------------------------------------------------------------------------------------------------------------------------------------------------------------------------------------------|
|  <b>Hôpital St-Boniface Hospital</b><br><br><b>WRHA Cardiac Surgery</b><br><b>Pre Op Delirium Score Card</b> |  <b>Hôpital St-Boniface Hospital</b><br><br><b>WRHA Cardiac Surgery</b><br><b>Pre Op Delirium Score Card</b> |
|-----------------------------------------------------------------------------------------------------------------------------------------------------------------------------------------------|-------------------------------------------------------------------------------------------------------------------------------------------------------------------------------------------------|

  

Date: 

|   |   |   |   |   |   |   |   |   |   |   |   |   |   |   |
|---|---|---|---|---|---|---|---|---|---|---|---|---|---|---|
|   |   |   |   |   |   |   |   |   |   |   |   |   |   |   |
| D | D | M | M | Y | Y | Y | Y | Y | Y | Y | Y | Y | Y | Y |

**Delirium Score** *(circle appropriate risk)*

Low Risk: 0 - 1      Medium Risk: 2 - 3      High Risk: 4 or Higher

If high risk implement the pre op delirium protocol

**Automatic High Risk if:**

Previous delirium and /or dementia      ☐ Yes      ☐ No

Alcohol cumulative screen score is  $\geq 7$  or higher (see reverse side)      ☐ Yes      ☐ No

| If not high risk complete score card below                                                                                                                             | Score |
|------------------------------------------------------------------------------------------------------------------------------------------------------------------------|-------|
| Age $\geq 65$ years                                                                                                                                                    | 1     |
| Previous Cerebral Vascular Accident                                                                                                                                    | 2     |
| Procedure Other Than Isolated Coronary Artery Bypass Graph or Valve                                                                                                    | 1     |
| Previous Cardiovascular Intervention (cardiac surgery or Percutaneous Coronary Intervention)                                                                           | 1     |
| Urgent Case Type (currently an inpatient awaiting cardiac surgery)                                                                                                     | 1     |
| History Mental Health Illness: Patient Health Questionnaire (PHQ) score $\geq 15$ , depression, anxiety (self-reported, previous diagnoses or currently being treated) | 1     |
| Alcohol cumulative screen score is $\geq 4$ for men or $\geq 3$ for women (see reverse side)                                                                           | 1     |
| <b>TOTAL SCORE</b>                                                                                                                                                     |       |

Signature: \_\_\_\_\_ Print: \_\_\_\_\_

**Alcohol Screening Tool**

- The screening tool that can help identify persons who are hazardous drinkers or have active alcohol use disorders (including abuse or dependence).
- Generally, the higher the score, the more likely it is that the patient's drinking is affecting her/his safety.

|                                                             |   |
|-------------------------------------------------------------|---|
| <b>1. How often do you have a drink containing alcohol?</b> |   |
| A Never                                                     | 0 |
| B Monthly or less                                           | 1 |
| C 2-4 times a month                                         | 2 |
| D 2-3 times a week                                          | 3 |
| E 4 or more times a week                                    | 4 |

|                                                                                                                                                                                    |   |
|------------------------------------------------------------------------------------------------------------------------------------------------------------------------------------|---|
| <b>2. How many standard drinks containing alcohol do have in a typical day?</b><br>(standard drink is defined as 12 oz. of beer/cider, 5 oz. of wine or 1.5 oz. distilled alcohol) |   |
| A 1 or 2                                                                                                                                                                           | 0 |
| B 3 or 4                                                                                                                                                                           | 1 |
| C 5 or 6                                                                                                                                                                           | 2 |
| D 7 to 9                                                                                                                                                                           | 3 |
| E 10 or more                                                                                                                                                                       | 4 |

|                                                                     |   |
|---------------------------------------------------------------------|---|
| <b>3. How often do you have six or more drinks in one occasion?</b> |   |
| A Never                                                             | 0 |
| B Less than monthly                                                 | 1 |
| C Monthly                                                           | 2 |
| D Weekly                                                            | 3 |
| E Daily or almost daily                                             | 4 |

Date stopped alcohol intake: 

|   |   |   |   |   |   |   |   |   |   |   |   |   |   |   |
|---|---|---|---|---|---|---|---|---|---|---|---|---|---|---|
|   |   |   |   |   |   |   |   |   |   |   |   |   |   |   |
| D | D | M | M | Y | Y | Y | Y | Y | Y | Y | Y | Y | Y | Y |

**TOTAL SCORE:** \_\_\_\_\_

Comments: \_\_\_\_\_

\_\_\_\_\_

\_\_\_\_\_

March 23, 2015      7102-0257-2

Page 1 of 2

Page 2 of 2

Figure S1. Delirium score card.
